# Supplementary material for: MDH1 and MPP7 Regulate Autophagy in Pancreatic Ductal Adenocarcinoma
Source: Oxford University Press journal article supplement (doi:10.1158/0008-5472.can-18-2553), 2019-02-14
Supplement: 00085472can182553-sup-207122_2_supp_5323970_pmg8wl.xlsx [file 00085472can182553-sup-207122_2_supp_5323970_pmg8wl.xlsx]

## Sheet: Sheet 1
siRNA	% viability relative to RISC-free control	qPCR (% mRNA expression levels relative to RISC-free control)
TRIP (04)	131.14	21
FGF18 (04)	106.357	*
CHRNG (1)	91.5992	no knockdown
TAX1BP1 (04)	87.1565	6
HELIC1/ASCC3 (23)	86.4414	*
TEAD3 (02)	85.5897	27
NDUFB10 (03)	84.6877	3
FGF18 (01)	82.9387	*
NFIA (02)	80.7475	*
SYNCRIP (01)	79.3463	14
TMF1 (02)	78.5546	11
PDHA1 (06)	76.742	no knockdown
RDX (01)	75.1134	6
PTCD1 (01)	74.7808	34
MXD1 (02)	70.5247	*
C9ORF126/SCAI (04)	69.6006	22
C9ORF126/SCAI (01)	67.1976	94
QKI(02)	65.9479	33
SULF1 (1)	62.3361	14
PARN (04)	60.8632	44
STEAP2 (01)	59.6285	20
LMO2 (02)	58.7788	*
XK (04)	57.0406	*
BECN1 (03)	56.206	8
MAP1LC3B (03)	56.1579	19
PPP3CA (01)	53.9127	25
USP22 (2)	53.9033	25
GALNTL2/GALNT15 (04)	52.2334	*
PTPRE (02)	51.9174	23
GTF2H1 (01)	50.9331	29
TRIP (03)	50.9269	10
PTPN22 (01)	50.1084	*
GLG1 (01)	49.9398	18
GLG1 (04)	47.6937	no knockdown
FAP (12)	45.7611	*
FAM40B/STRIP2 (02)	44.3853	45
DKFZP434L0117/CEP85 (17)	43.7335	*
FAM40B/STRIP2 (01)	41.6867	32
MTRF1L (03)	41.6767	20
NIF3L1 (04)	41.2368	12
ATPIF1 (01)	41.1834	7
GALNTL2/GALNT15 (03)	39.2877	*
ZBTB33 (03)	39.2652	18
AAAS (17)	38.9229	10
QKI (04)	37.8732	45
KIF2C (03)	37.4271	*
TPM4 (02)	37.421	13
C9ORF126/SCAI (18)	37.2573	46
SSR4 (03)	37.1723	4
B3GALT5 (2)	36.8657	37
MDH1 (04)	36.2495	40
GALNT1 (06)	35.3194	8
DKFZP434L0117/CEP85 (03)	35.0595	*
ZBTB33 (17)	34.8854	10
WTAP (01)	34.8734	48
SULF1 (02)	34.5479	16
ACP1 (02)	34.2455	14
GRIA3 (02)	33.9849	19
OPHN1 (04)	33.5626	12
FAP (11)	31.8728	*
B3GALT7 (3)	31.0746	no knockdown
BECN1 (02)	31.0055	3
KIF2C (05)	30.9826	*
DCLRE1C(03)	30.9104	no knockdown
SSR4 (05)	30.4256	3
GLG1 (03)	29.4464	31
MXD1 (04)	29.1643	*
GLG1 (02)	28.9873	20
C18ORF9/CEP76 (03)	28.3749	87
NOTCH3 (02)	28.1761	67
PAK1 (03)	28.171	no knockdown
STEAP2 (04)	27.309	9
KIAA1191 (17)	26.7714	16
LMO2 (03)	26.301	*
CCR5 (01)	25.7275	72
CATSPER4 (03)	25.4752	13
MTRF1L (4)	25.1898	26
NOTCH3 (03)	24.8392	*
MPP7 (04)	24.5416	*
RDX (04)	23.9984	13
PAK1 (07)	23.6673	no knockdown
NDUFB10 (01)	23.4169	1
HELIC1/ASCC3 (21)	23.1747	*
DKFZP434L0117/CEP85 (02)	22.7058	*
IDH1 (02)	22.5331	2
MDH1 (02)	22.3614	1
DCLRE1C (02)	22.1292	no knockdown
RBM7 (02)	21.62	35
SYNCRIP (03)	21.4	7
ACP1 (18)	21.3171	15
C1RL (03)	21.3089	*
TAX1BP1 (02)	21.0527	14
MAP1LC3B (01)	19.7973	0
C9ORF126/SCAI (03)	19.5861	34
TEAD3 (03)	18.5663	*
C1D (03)	18.5427	63
NFIA (03)	18.504	*
GTF2H1 (04)	18.1567	26
C1RL (02	16.8895	*
C18ORF9/CEP76 (01)	16.5781	16
HELIC1/ASCC3 (22)	15.9299	*
C1D (01)	15.9111	58
UBR1 (03)	12.4692	29
CATSPER4 (02)	11.3748	*
PPP3CA (04)	11.195	20
AAAS (02)	10.9754	17
WTAP (20)	10.7251	53
TMF1 (04)	9.74638	6
PTPRE (03)	8.89032	23
PTPN22 (03)	8.20163	*
ATPIF1 (04)	7.68514	29
B3GALT7 (4)	7.59574	58
HELIC1/ASCC3 (24)	6.02461	*
B3GALT5 (1)	5.95906	no knockdown
DKFZP434L0117/CEP85 (04)	5.24545	*
KIAA1191 (02)	4.92045	8
* indicates qPCR data was inconclusive
